# Supplementary material for: ATR kinase inhibition induces unscheduled origin firing through a Cdc7-dependent association between GINS and And-1
Source: PubMed Central journal article supplement (PMC5680267; doi:10.1038/s41467-017-01401-x), 2017-11-09
Supplement: 41467_2017_1401_MOESM3_ESM.pdf [file 41467_2017_1401_MOESM3_ESM.pdf]

## **Description of Additional Supplementary Files**

File Name: Supplementary Data 1

Description: The nuclease-insoluble chromatin proteome in 293T cells treated with vehicle or ATRi AZD6738 identified using high resolution liquid chromatography-tandem mass spectrometry (LC-MS/MS). Protein abundance differences were determined by spectral counting (PSM, peptide spectral match).
